# Supplementary material
Source: Research Square preprint supplement (doi:10.21203/rs.3.rs-9281659/v1)
Supplement: Supplementary file 1 [file a55a7f1788145e9360457e22.docx]

**Selective Targeting of uPAR-driven Pro-Tumor Neutrophil Extracellular Traps Functional Clusters Attenuates Tumor Progression and Preserves Immunostimulatory Potential to Boost Cholangiocarcinoma Immunotherapy**

short title: Targeting uPAR-driven Pro-Tumor NETs Clusters Enhances CCA Immunotherapy

**Supplementary material list:**

**Methods**

**Supplementary figures and legends**

**Supplementary tables**

**Methods**

**Cohorts and Ethical Approval**

**TCGA-CCA Cohort:** Transcriptomic data and clinical follow-up information were retrieved from The Cancer Genome Atlas (TCGA) database, including patients with available NETs-related gene expression and prognostic data.

**Public available Cohorts**: A total of 255 patients from FU-iCCA cohort[1], 81 patients from Jusakul cohort[2] (GEO89747), 438 patients from Fan cohort[3] (HRA004952), 114 patients from Sia cohort[4] (GSE33327) and 95 patients from Ni cohort[5] (HRA005369/HRA009951) were included. Among those transcriptome data were available in FU-iCCA cohort, Jusakul cohort, Sia cohort, Fan cohort, and Ni cohort, clinical and prognosis data were avaliable in FU-iCCA and Jusakul cohort.

**Huashan Cohorts:** 100 CCA patients who underwent surgical resection at our institution (2018–2024). All samples were collected with written informed consent from patients, and the study was approved by the Ethics Committee of Huashan hospital, Fudan university. Two senior hepatobiliary pathologists independently made double-blind diagnoses of all cases for CCA. Tissue samples including tumor tissues, non-tumor tissues were fixed in 4% paraformaldehyde (PFA, Beyotime,) for paraffin embedding or flash-frozen in liquid nitrogen for molecular analysis; plasma samples were stored at -80°C until use.

**Cell Culture and Treatment**

**Cell Lines and Culture Conditions**

Human CCA Cell Lines CCLP1 and RBE (obtained from Shanghai Cell Bank and Chinese Academy of Science) and mouse CCA Cell Line: SB1 (purchased from Shanghai Yaji Biotechnology Co) were cultured in RPMI 1640 medium (Gibco) supplemented with 10% fetal bovine serum (FBS, Gibco) and 1% penicillin-streptomycin (Beyotime). Neutrophil-like Cell Line: Human dHL60 cells (obtained from Shanghai Cell Bank and Chinese Academy of Science) were induced to differentiate into neutrophil-like cells with 1.25% DMSO (Sigma) for 5 days (dHL60), then cultured in RPMI 1640 with 10% FBS[6]. All cells were maintained at 37°C in a 5% CO₂ incubator.

**Peripheral blood mononuclear cells (PBMCs):** isolated from fresh peripheral blood of healthy donors or CCA patients using Ficoll-Paque Plus .

**Human Neutrophils**: purified from fresh peripheral blood by Polymorphprep (Axis Shield, 1114683) centrifugation accroding to instruction.

**Mouse Neutrophils:** Bone marrow cells were harvested from C57BL/6 mice (6–8 weeks old) in HBSS (Beyotime), layered on a 2-layer Percoll gradient (65%/55%, Cytiva), and centrifuged (1000×g, 30 min, RT, no brake). Neutrophils were collected from the interface and resuspended in RPMI 1640.

**Multiplex Immunofluorescence (mIF) Staining and Tyramide Signal Amplification(TSA) staining**

Service of mIF and TSA was acquired at RunnerBio (Shanghai, China). In brief, paraffin-embedded tissue sections were deparaffinized, rehydrated, and subjected to antigen retrieval (citrate buffer, pH 6.0, 95°C for 20 min). Sections were blocked with 1% BSA (Beyotime) for 1 h at room temperature (RT), then incubated with primary antibodies overnight at 4°C. The following primary antibody was used: anti-H3cit (Abcam, 219407), anti-MPO (CST, 14569), anti-uPA (Proteintech, 17968), anti-uPAR (Proteintech, 82953), anti-GZMB (Proteintech, 13588), p-ERK (CST, 4370), pan-CK (Protertech, 26411-1-ap), CD3(PTM BIO, ptm-5013), CD11c (CST, 97585). for IF procedure, sections were incubated with fluorescent-conjugated secondary antibodies (Beyotime) for 1 h at RT in the dark. Nuclei were stained with DAPI (Beyotime). For TSA, sections were prepared following the instructions(Runnerbio). Images were acquired using a scanning system (Nikon DS-Fi2) and analyzed with ImageJ software. Cell immunofluorescence staining was performed in similar method, with extra primary antibody used: anti-TLR4/9 (Santa Cruz).

**CCA Conditioned Medium (CM) Preparation**

Fresh CCA tumor tissues (human or mouse) were minced into 1–2 mm³ fragments, digested with collagenase IV (Sigma,) and DNase I (Solarbio,) for 30 min at 37°C, then filtered through a 70 μm cell strainer to obtain single-cell suspensions. Cells were seeded at 1×10⁶ cells/mL in serum-free medium and cultured for 48 h. The supernatant was collected, centrifuged (1200×g, 10 min, 4°C) to remove debris, and stored at -80°C as CM. For CCA cell line-derived CM, a similar method was used: cells were cultured to logarithmic growth phase, washed twice with PBS to remove residual serum before seeding in serum-free medium for 48 h, followed by supernatant collection and centrifugation as above.

**NETs Induction､preparation and detection**

**In Vitro NETs Induction**

Neutrophils (5×10⁵ cells/well) were treated with CCA CM (1:1 dilution with RPMI 1640), PMA (20 nM, Sigma), or PBS (negative control) for 4–6 h at 37°C.

For dHL60-derived NETs: Differentiated dHL60 cells were treated with PMA (20 nM) for 4 h, with or without prior transfection with siuPA.

**NETs detection**

NETs detection was describled in our previous work[7]. Briefly, for visualization, neutrophils were seeded on 96-well plates for corresponding incubation, and cell-impermeable DNA dye SytoxGreen (Thermo Fisher Scientific, 1:10000) and/or cell-permeable DNA dye Hoechst 33342 (Thermo Fisher Scientific, 1:1000) were added to the incubation system according to the manufacturer’s directions. At the end of incubation, the plates were directly moved to fluorescence microscope (Leica) for NETs formation visualization. In some cases, neutrophils were seeded on coverslips in 24-well plates to generate NETs as described above, and then the formed NETs were fixed for further immunofluorescence detection of NETs component.

For quantification, NETs-DNA generated by neutrophils were digested with 500 mU/ml micrococcal nuclease (MNase; Worthington). The nuclease activity was stopped with 5 mM Ethylenediaminetetraacetic acid (EDTA) and the culture supernatants were collected and stored at -80℃ until further use. NETs-DNA in the supernatants was quantified by PicoGreen® dsDNA Quantitation Reagent (Thermo Fisher Scientific) with fluorescence spectrometry under filter setting of 480 nm/520 nm excitation/emission and semi-quantitatively standardized to control group.

**Preparation of NETs and NETs-DNA scaffold**

For whole NETs preparation, freshly isolated human CCA peripheral neutrophils were seeded on 6-well plates (1×107/well), and stimulated with 20nM PMA for 4 hours to form NETs. Then the supernatants were discharged carefully by slow suction and washed twice to eliminate residual PMA or NETs-unassociated substances without disturbing NETs. RPMI (1mL) containing MNase (1U/mL) was then added to digest NETs at 37℃ for 20 minutes followed by 5mM EDTA to stop nuclease activity. The supernatant containing NETs were collected and centrifuged to eliminate cell debris. Isolated NETs were stored at -80°C for further use.

The DNA component in the isolated NETs was purified using the QIAamp DNA Mini kit (Qiagen, USA), and the concentration of the purified DNA was qualified using a Nano-drop (Thermo Scientific, Waltham, MA)[8, 9].

**Cell Transfection**

**siRNA-Mediated Knockdown**

SiRNA-Mediated Knockdown was performed as previously reported[7]. Briefly, for uPA or uPAR knockdown in dHL60 or CCA cells, cells were transfected with siuPA or siuPAR from OBiO Technology(Shanghai)Corp.,Ltd, using Lipofectamine 3000 (Invitrogen) according to the manufacturer’s protocol. Transfection efficiency was verified by qPCR 48 h post-transfection.

**KRAS wild-type or mutation modulation**

KRAS wild-type or mutant modulation was performed as described in previous reports[10]. Briefly,lentiviruses expressing KRAS wild-type (wt) and KRASmut (G12D) were purchased from OBiO Technology(Shanghai)Corp.,Ltd. KRAS wt CCLP1 and KRAS G12D-mutant RBE cells were prepared as 3–5×10⁴ cells/ml suspensions, 100 μl of which was seeded into 96-well plates and incubated at 37°C with 5% CO₂ for 18–24 h. Lentiviruses were added at specific multiplicities of infection: CCLP1 cells (KRAS wt) with KRAS G12D lentivirus to generate KRAS-mutant cells; RBE cells (KRAS G12D) with KRAS wt lentivirus to establish KRAS-normalized cells. After 12–16 h of infection, medium was replaced with complete DMEM and cultured for 3–4 days. Infection efficiency was assessed via lentiviral fluorescent protein under a fluorescence microscope. Stably transfected cells were selected with 2 μg/ml purinomycin for over 1 week, and successful KRAS overexpression was verified by Western blot (WB).

**Cell Proliferation Assay**

For the colony-forming assay, CCA cells (CCLP1, RBE, SB1) were seeded in 6-well plates at a density of 500 cells/well and allowed to adhere overnight at 37°C with 5% CO₂. Cells were then treated with NETs, recombinant uPA (10 nM, MedChemExpress), STING inhibitor H - 151 (10 mM, Proteintech), JAK - STAT inhibitor ruxolitinib (1 μM, Selleckchem), UPARANT (10 nM, MedChemExpress), or NETs + UPARANT (10 nM, MedChemExpress) for the indicated duration. The culture medium was refreshed every 3 days to maintain consistent treatment conditions. After 7 days of incubation the medium was discarded, and cells were fixed with 4% paraformaldehyde for 20 min at room temperature. Fixed cells were stained with 0.1% crystal violet solution for 15 min, followed by thorough washing with distilled water to remove excess dye. Colonies were counted under a light microscope. The colony-forming efficiency was calculated as (number of formed colonies / number of inoculated cells) × 100%, and relative colony-forming capacity was normalized to the control group.

**Chemotaxis Assay**

A 24-well Transwell system (4.0 μm, Corning) was used. The lower chamber was filled with CM from CCA cells with indicated treatment (1:1 in RPMI 1640) or control CM; the upper chamber was seeded with human PBMCs (5×10⁵ cells/well). After 3 h of incubation at 37°C, migrated cells in the lower chamber were counted under a light microscope.

**Animal Experiments**

**Experimental Animals**

6–8-week-old male C57BL/6 mice and male BALB/c nude mice were purchased from GemPharmatech Co., Ltd (Jiangsu, China); C57BL/6 mice were used for subcutaneous (SB1 s.c.), orthotopic hepatic (SB1 i.hep.), and hydrodynamic injection-induced spontaneous CCA models (YA/YAK), while BALB/c nude mice were applied for subcutaneous xenograft models of human KRAS-mutant CCA cell lines (CCLP1 s.c.). PADI4 knockout mice (S100a9Cre/+;Padi4f/f, abbreviated as Padi4-ko) were generously provided by Dr. Hu (Department of Rheumatology and Immunology, Ruijin Hospital, Shanghai Jiao Tong University School of Medicine, Shanghai, China). The mice were generated by crossing S100a9Cre transgenic mice with Padi4f/f mice (both C57BL/6 background) to achieve conditional Padi4 knockout in neutrophils, as previously characterized[11]. Genotyping was performed via PCR following the protocol and primer design described in the aforementioned study to confirm the Padi4 knockout allele and Cre recombinase transgene. These ko mice were used to establish CCA models with NETs formation deficiency. All mice were housed in a pathogen-free vivarium maintained at 22–24°C with 50–70% humidity and a 12 h light/dark cycle, provided with standard chow and sterile water ad libitum. All animal experiments were approved by the Institutional Animal Care and Use Committee of Huashan hospital.

**Hydrodynamic Injection-Induced Spontaneous CCA Models (YA/YAK)**

Plasmids included pT3-EF1α-YAPS127A (Addgene Cat# 86497), pT3-EF1α-HA-myr-Akt (Addgene, Cat# 31789), pT3-EF1α-AKT-HA-p2A-FLAG-YAPS127A, pT3-EF1α-KRASG12D (human NM_004985), and SB-luc transposase plasmid. For the YA model (YAP/AKT-driven CCA), 15 μg pT3-EF1α-YAPS127A + 10 μg pT3-EF1α-HA-myr-Akt + 10 μg SB-luc (10:1 transposon:transposase ratio) was diluted in 2 mL PBS (10% of mouse body weight) and injected into the lateral tail vein of FVB/N mice via hydrodynamic injection (HDTVi) within 6–8 s. The YAK model (YAP/AKT/KRAS-driven CCA) followed the same protocol with the combination of 10 μg pT3-EF1α-AKT-HA-p2A-FLAG-YAPS127A 2.5 μg pT3-EF1α-KRASG12D to the plasmid mixture. Tumor progression was quantified by tumor weight and liver-to-body weight ratio at the experimental endpoint (when signs of tumor progression or cachexia appeared). Mice were sacrificed, and livers and tumors were harvested for weight measurement, paraffin embedding, and fresh tissue collection for subsequent analyses.

**Subcutaneous Tumor Models (SB1 s.c. / CCLP1 s.c.)**

The mouse CCA cell line SB1 was used; 2×10⁶ SB1 cells resuspended in 100 μL PBS were subcutaneously injected into the right flank of C57BL/6 or padi4-ko mice. A similar method was used to establish the CCLP1 subcutaneous xenograft model: 2×10⁶ human CCA cell line CCLP1 (CCLP1-vector and CCLP1-KRASmut) were respectively injected into the left and right flanks of the same BALB/c nude mouse for direct growth difference comparison. Tumor volume was continuously measured every 3 days using a digital caliper (calculated as Volume = (length × width²)/2). All mice were sacrificed at 3-4 weeks post-inoculation, and harvested tumors were freshly prepared for further tests.

**Orthotopic Hepatic Tumor Models (SB1 i.hep.)**

The mouse CCA cell line SB1 was used; mice were anesthetized via intraperitoneal (i.p.) injection of tribromoethanol (250 mg/kg, Selleck), a 1–2 cm midline abdominal incision was made to expose the left hepatic lobe, and 2×10⁶ SB1 cells (resuspended in 20 μL growth factor-reduced Matrigel, Corning) were injected into the hepatic parenchyma using a 30G needle. The hepatic lobe was returned to the abdominal cavity, and the incision was closed with layered absorbable sutures. Post-operatively, mice received buprenorphine (0.5 mg/kg, i.p.) for analgesia every 12 h for 3 days. Mice were sacrificed 4 weeks post-injection; liver tumors were collected to quantify progression by measuring maximum diameter, and fresh tumor tissues were reserved for further tests.

**In Vivo Interventions**

Mice were given indicated interventions starting at time points specified in the results, including the following interventions used alone or in combination: padi4-ko mouse model for NETs ablation in SB1 s.c., SB1 i.hep., and YA/YAK models; PADI4 inhibitor GSK484 (5 mg/kg, MCE, twice weekly i.p.) in BALB/c nude mice; NETs-degrading DNase I (200 U/mouse, Solarbio, daily i.p.) in YA/YAK or SB1 i.hep. models; UPARANT (20mg/kg MedChemExpress, daily, i.p.) in SB1 i.hep., YA/YAK models; dexamethasone (1 mg/kg/day, Sigma Aldrich, daily oral, initiated 1 week after tumor implantation) for immune modulation in SB1 s.c. models, anti-PD-L1 antibody (200 μg/mouse, BioXCell, Cat# BE0101, twice weekly i.p.) in YAK or SB1 i.hep. models.

**RNA Extraction and Quantitative Real-Time PCR (qPCR)**

Total RNA was extracted from cells or tissues using TRIzol reagent (Invitrogen, 15596026). RNA quality was verified by a spectrophotometer, and 1 μg RNA was reverse-transcribed into cDNA using a PrimeScript RT Reagent Kit (Takara). qPCR was performed on a CFX96 Real-Time PCR System (Bio-Rad) using SYBR Premix Ex Taq II (Takara). Relative gene expression was calculated using the 2⁻ΔΔCt method, with GAPDH as the internal reference. Primer sequences are listed in Supplementary Table 1.

**Western Blotting (WB)**

Cells or tissues were lysed in RIPA buffer (Beyotime). Protein concentration was measured using a BCA Protein Assay Kit (Beyotime). Equal amounts of protein were separated by 10% SDS-PAGE, transferred to PVDF membranes, and blocked with 5% non-fat milk for 1 h at RT. Membranes were incubated with primary antibodies overnight at 4°C: anti-p-ERK1/2 (CST, 9101S), anti-ERK1/2 (CST,4695T), and anti-ACTIN (CST, 5174S), anti-KRASmut (G12V for RBE, CST, 14412; G12D for CCLP1, CST, 14429). After washing, membranes were incubated with HRP-conjugated secondary antibodies (CST,) for 1 h at RT. Signals were detected using an ECL Western Blotting Substrate (Millipore).

**Bulk RNA-seq**

Total RNA from CCA tissues (mouse YA/YAK models) or NETs-treated cells was used for library construction with a TruSeq Stranded mRNA Library Prep Kit (Illumina, Cat# RS-122-2101) and sequenced on an Illumina NovaSeq 6000 platform (150 bp paired-end reads). Raw reads were filtered using Trimmomatic, aligned to the human hg38 or mouse mm10 genome using HISAT2, and gene expression was quantified using featureCounts. Differentially expressed genes (DEGs) were identified using DESeq2 (|log₂FC| > 1.5, adj. P < 0.05).

**Single-cell RNA sequencing (scRNA-seq) of CD66b⁺ tumor-associated neutrophils (TANs)**

Referred to a related report[6], CD66b⁺ tumor-associated neutrophils (TANs) were sorted from fresh human CCA tissues using a BD FACS SRT flow cytometer with anti-CD66b(Abcam, ab197678)antibody. Single-cell suspensions with viability >90% were subjected to library construction using the BD Rhapsody NOVA system. Samples were processed per the manufacturer’s protocol and sequenced on an Illumina NovaSeq 6000 sequencer. Sample demultiplexing, barcode processing, alignment, filtering, unique molecular identifier counting and aggregation of sequencing runs were performed using the Cell Ranger analysis pipeline (v1.2).

Downstream analysis were performed using Seurat package (v4.0.5) . in Brief, Cells with fewer than 500 genes or more than 5,000 and with mitochondrial gene count over 20% of the total library were excluded from downstream analysis. The highly variable genes were selected using the Find Variable Features function. Principal component analysis was performed using the top 2000 variable genes. Clustering was performed using the FindClusters function. Unsupervised clustering was performed with resolution = 0.5 on top 30 dimensions.

**Spatial Transcriptomics**

Frozen tissue sections from human CCA tissues were prepared for spatial transcriptomic analysis. Tissue samples were quickly rinsed with pre-cooled RNase-free 1× PBS to remove residual blood, and the surface was blotted with sterile gauze. Tissues were cut into small pieces (6.8 mm²), snap-frozen in isopentane pre-chilled with liquid nitrogen, embedded in optimum cutting temperature (OCT) compound (SAKURA, 4583), and stored at −80°C until use.

Frozen tissues were sectioned at 10 µm thickness in a pre-cooled cryostat and placed onto BMKMANU S1000 Spatial Transcriptomics slides containing capture areas with barcoded primers. Sections were fixed in 3.7%–3.8% formaldehyde in PBS for 30 min, followed by staining with Mayer's hematoxylin for 4 min, bluing buffer for 30 s, and 1:5 diluted eosin for 30 s. Bright-field images were acquired at 20× magnification using a Metafer Slide Scanning platform. After imaging, sections underwent pre-permeabilization with 0.5 U/ml collagenase and 0.2 mg/ml BSA at 37°C for 20 min, followed by permeabilization with 0.1% pepsin in 0.1 M HCl at 37°C for 7 min.

Spatial libraries were constructed following the manufacturer's protocol, including reverse transcription, second-strand cDNA synthesis, and adaptor ligation. Libraries were sequenced on an Illumina NovaSeq 6000 sequencer with a sequencing depth of at least 50,000 reads per spot and 150 bp paired-end reads. Sample demultiplexing, barcode processing, alignment, and filtering were performed using standard spatial transcriptomics analysis pipelines.

Downstream analysis of spatial transcriptomics data was performed using the Scanpy package following a standard workflow. Briefly, data loading and quality control were conducted using sc.read, sc.pp.calculate_qc_metrics, sc.pp.filter_cells, and sc.pp.filter_genes functions. Spots with fewer than 500 genes or with mitochondrial gene count over 20% of the total library were excluded from downstream analysis. Data normalization and scaling were performed using sc.pp.normalize_total, sc.pp.log1p, sc.pp.highly_variable_genes, and sc.pp.scale functions. The highly variable genes were selected, and the top 2000 variable genes were used for subsequent analysis. Dimensionality reduction was performed using sc.tl.pca, sc.pp.neighbors, sc.tl.umap, and sc.tl.tsne functions on the top 30 principal components. Unsupervised clustering was performed using the sc.tl.leiden function with resolution = 0.5. Differential gene expression analysis and visualization were conducted using sc.tl.rank_genes_groups, sc.pl.umap, and sc.pl.spatial functions.

**Mass Cytometry (CyTOF)**

Fresh tumor tissues were mechanically and enzymatically dissociated into single cell suspensions. After filtration and red blood cell lysis, viable cells were counted and adjusted to the appropriate concentration. Cells were then incubated with a panel of 41 metal‑conjugated antibodies according to the manufacturer’s instructions. Following surface and, where applicable, intracellular staining, cells were fixed, permeabilized, and labeled with an iridium intercalator for DNA staining.

Data acquisition was performed on a Helios3 CyTOF mass cytometer (PLTTech, Hangzhou, China). Raw CyTOF data were normalized and bead‑based signal drift was corrected. Subsequent data processing and analysis were performed using Cytobank (Beckman Coulter) and R software. Unsupervised clustering and t‑distributed stochastic neighbor embedding (t‑SNE)–based dimensionality reduction were conducted based on the expression profiles of the measured markers. In R, data preprocessing, transformation, and visualization followed established mass cytometry pipelines using the cytofWorkflow, ConsensusClusterPlus, and CATALYST packages, which were employed to perform automated gating, consensus clustering, dimensionality reduction, and cell‑type annotation[12].

**Bioinformatics Analysis**

**NETs-score Construction**

A NETs-related gene set was curated based on previous literature, and NETs-score for each sample was calculated as the GSEA enrich score of NETs-related gene set[13].

**Weighted Gene Co-expression Network Analysis (WGCNA)**

DEGs induced by NETs (NETs-regulated genes, NRGs; |log₂FC| > 1.5, adj. P < 0.05) from CCLP1/RBE RNA-seq data were used for WGCNA (R package ‘WGCNA’). A soft threshold (β = 6) was selected to construct a co-expression network; modules were identified using the dynamic tree cut method (minModuleSize = 30). Modules were annotated by Gene Ontology (GO) and Kyoto Encyclopedia of Genes and Genomes (KEGG) pathway enrichment analysis (clusterProfiler, adj. P < 0.05) to define 5 functional clusters (C1–C5). Correlation were calculated between each module and clinical characteristics including mutation, geneset enrichment score of NETs, tumor infiltration lymphocyte, extracellular matrix and ESTIMATE score.

**Classification Model Construction**

To develop predictive models for C4 molecular subtype classification, we integrated multi-modal data comprising clinical parameters (tumor size, CA19-9 concentration, and serum bilirubin level) and transcriptomic profiling from the Fu-iCCA cohort. A comprehensive machine learning framework encompassing six distinct algorithms—Naive Bayes, Support Vector Machine (SVM), eXtreme Gradient Boosting (XGBoost), linear regression, random forest, and decision tree—was constructed using the 'tidymodels' R package. The complete dataset was randomly partitioned into a training cohort (70%) and an independent test cohort (30%) for model development and validation. Model discriminative performance was systematically evaluated using the area under the receiver operating characteristic curve (AUC), and the clinical prognostic value was assessed through Kaplan-Meier survival analysis.

**Other Bioinformatics Tools**

GSEA: Gene Set Enrichment Analysis (GSEA, v4.3.2) was used to assess enrichment scores of functional clusters (C1–C5) in clinical samples.

PCA: Principal Component Analysis (PCA) was performed using the ‘prcomp’ function in R to visualize sample clustering based on NETs-score or functional cluster scores.

STRING Analysis: Protein-protein interaction (PPI) networks for cluster hub genes were constructed using STRING (v11.5) with a confidence score > 0.7; hub genes were identified using the ‘degree’ algorithm.

**Statistical Analysis**

All statistical analyses were performed using GraphPad Prism (v9.5.0) and R (v4.2.2). Continuous data were presented as mean ± standard deviation (SD). Differences between two groups were analyzed using Student’s t-test; multiple groups were compared using one-way or two-way ANOVA with Tukey’s post-hoc test. Survival curves were plotted using the Kaplan-Meier method and compared by the log-rank test. Correlations were analyzed using Pearson’s correlation coefficient. P < 0.05 was considered statistically significant (*P < 0.05, **P < 0.01, ***P < 0.001, ****P < 0.0001).

**Figure S1 Functional verification of NETs-regulated genes, prognostic analysis and immune cell infiltration characteristics**

**A** Principal Component Analysis (PCA) of NETs-regulated genes in normal and tumor tissue samples.

**B** Expression analysis of NETs marker molecules (H3cit and MPO) in tumor and non-tumor tissues from three murine CCA models (YA, SB1 i.hep, SB1 s.c.). Scar Bar: 50 μm.

**C** Extracellular DNA relaease from murine neutrophils treated with control medium and YA model-derived CCA conditioned medium (CM).

**D** Kaplan-Meier survival curves of the NETs-related prognosis in Fu-iCCA cohort and GEO89749 cohort.

**E** Colony formation fold change of SB1 cells with NETs stimulation.

**F** qPCR analysis of expression fold change of selected immune-related genes mRNA expression levels between padi4-wt and padi4-ko mice of the SB1 i.hep or YA models.

**G** Comparison of immune cell marker expression in YA model, related to CYTOF data in **Figure 1L**.

**H** Enrichment of selected immune-related pathway between NETs-high and -low samples in Fu-iCCA cohort.

**I** Expression fold change of selected immune-related genes expression levels from RNA-seq data of sorted CD45-/epCAM+ maligant cells in padi4-wt and padi4-ko mice from the YA model.

**J** RNA-seq expression fold change of selected immune regulatory genes in CCLP1 and RBE cells with or without NETs stimulation.

**K** Change of SB1 s.c. tumor progression in padi4-wt vs. ko mice with/without dexamethasone, realted **Figure 1P**.

Data are presented as mean ± SD; *p < 0.05, **p < 0.01.

**Figure S2 Validation of NETs expression, clinical correlation and immune-related gene profiles in CCA cohorts**

**A** Log fold change (logFC) of gene modules in CCLP1 and RBE cells under control (CON) and NETs stimulation conditions.

**B** Module-trait relationship analysis showing the correlation between different gene modulesand relevant traits, with color intensity indicating correlation strength.

**C** Functional annocation of C1-C5 function clusters.

**D** NRGs signature between NETs-high and -low groups in Fu-iCCA.

**E** UMAP clustering of CCA patients from the Jusakul cohort, distinguishing C4 response pattern subgroup from other subgroups.

**F-G** Comparasion of indicated clinical parameters in C4 or other reaction pattern ICC of Fu-iCCA and Huashan cohort

**H** ROC curves showing the performance of six machine learning algorithms in discriminating C4 response subgroups using clinical indicators. The Fu-iCCA cohort was randomly split into training (70%) and validation (30%) sets. Models were trained using 10-fold cross-validation on the training set, and performance was evaluated on the validation set.

**I-J** Overall survival of predicted reaction pattern of C4 and other functional clusters in Fu-iCCA and Huashan cohort.

****
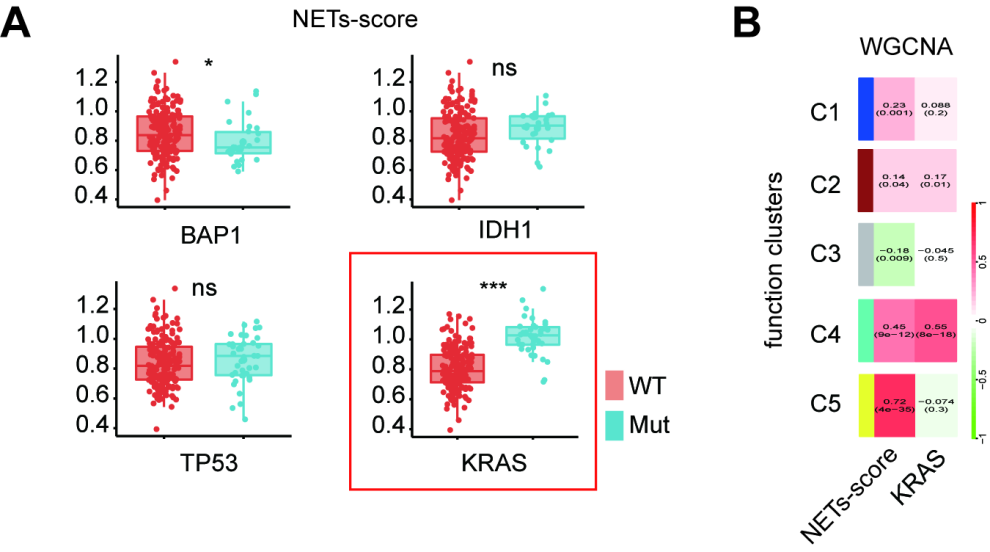
****

****Figure S3 Association of NETs-score with driver gene mutations and functional cluster analysis****

****A**** Box plots comparing NETs-score between wild-type and common mutant groups for CCA driver genes in FU-iCCA cohort.

****B**** WGCNA-based functional cluster analysis, depicting the correlation among NETs-score, KRAS mutation status, and five functional clusters (C1–C5).

Data are presented as mean ± SD; *p < 0.05, ***p < 0.001.

****
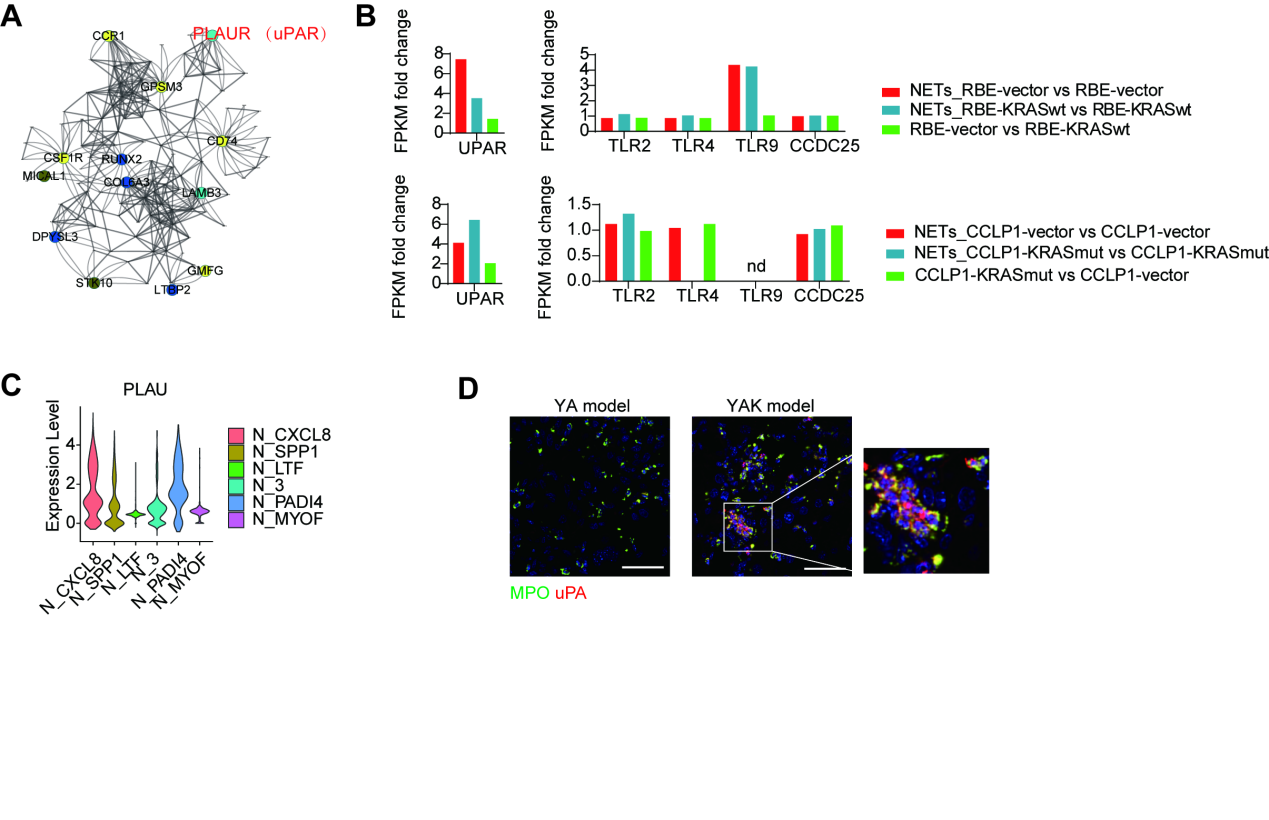
Figure S4 Characterization of uPAR-centered network, gene expression profiling, and spatial distribution of NETs components****

****A**** String analysis of protein–protein interaction network of functional clusters.

****B**** FPKM fold change analysis of uPAR and other reported NETs sensors in RBE and CCLP1 cell lines under different conditions (NETs stimulation, KRAS wild-type/mutant, and vector control). nd = not detected.

****C**** Violin plot showing the expression level of PLAU (encoding uPA) in each TAN subgroups, related to **Figure 1A and 4E**.

****D**** Immunofluorescence staining of MPO (green) and uPA (red) in NETs in YA and YAK murine CCA models, Scale bars: 50μm.

****
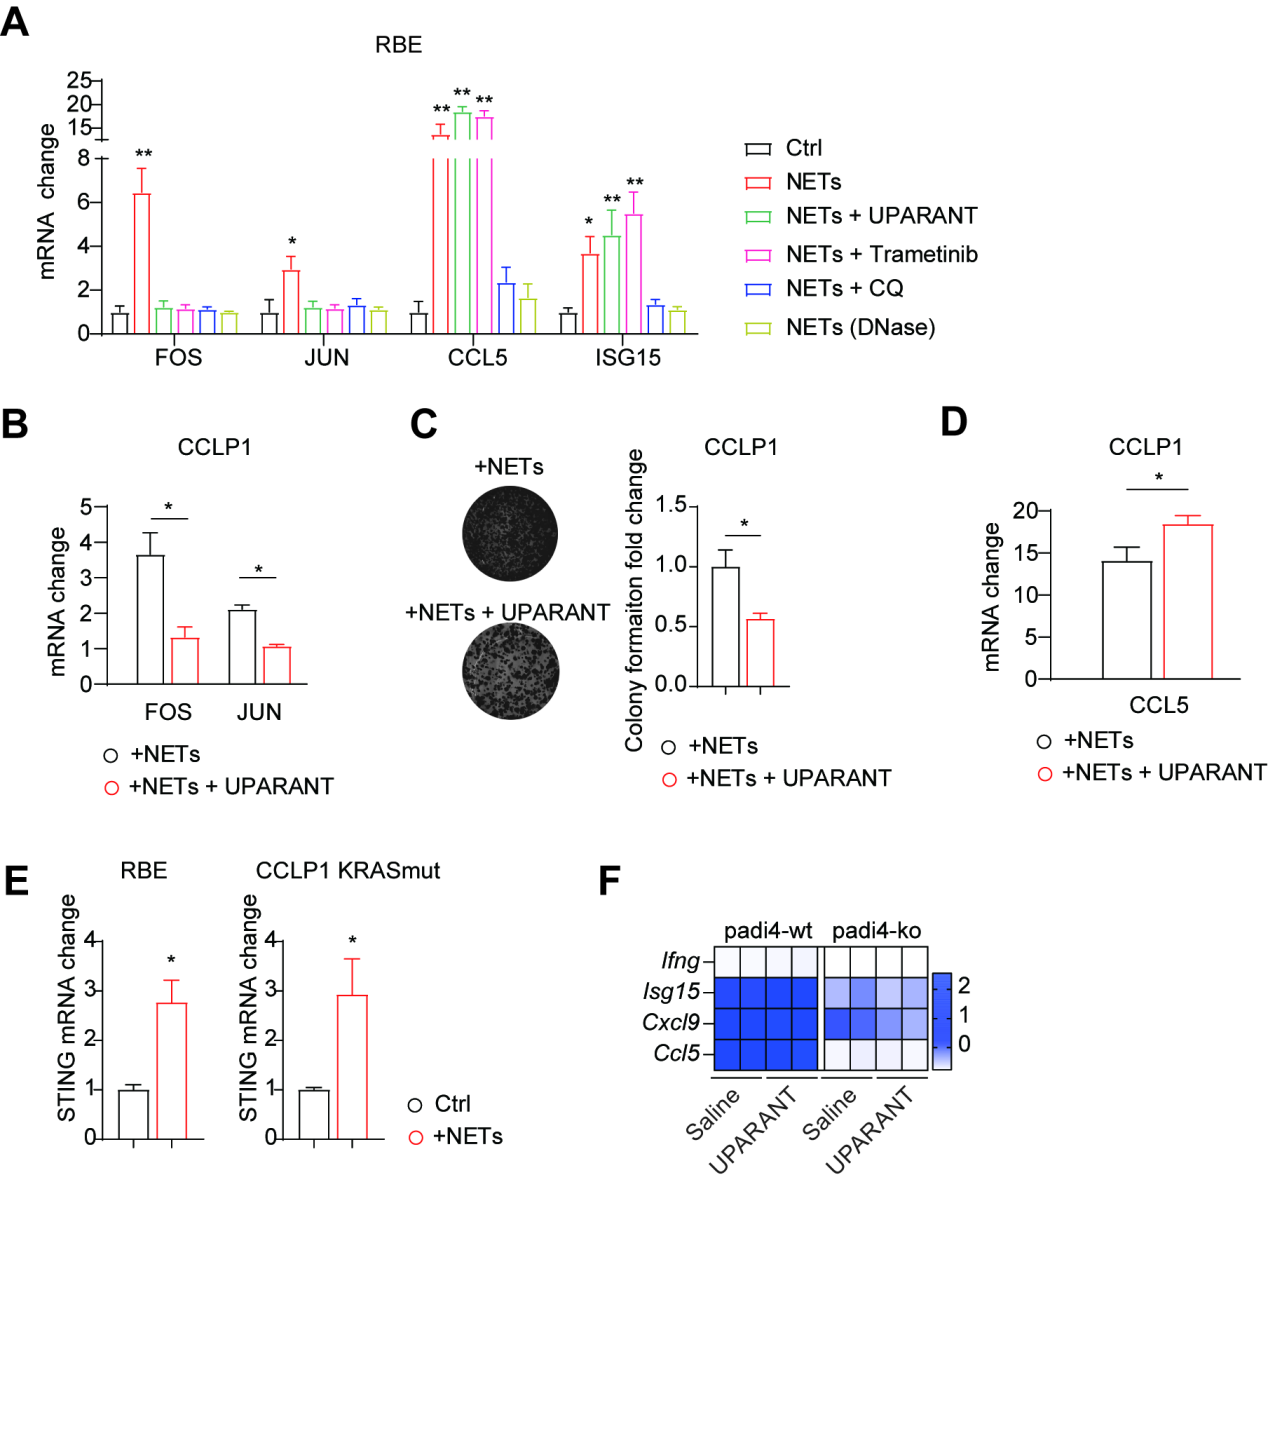
Figure S5 Functional validation of uPAR signaling and NETs-mediated gene regulation****

****A**** mRNA fold change analysis of selected MAPK genes and immune-stimulatory genes in RBE cells under indicated treatments.

****B**** mRNA fold change of MAPK genes in CCLP1 cells with NETs stimulation and NETs + UPARANT treatment.

****C**** Colony formation of CCLP1 cells with NETs stimulation and NETs + UPARANT treatment.

****D**** mRNA fold change of CCL5 in CCLP1 cells with NETs stimulation and NETs + UPARANT treatment by qPCR.

****E**** mRNA fold change of STING in RBE and CCLP1 KRASmut cells with NETs stimulation.

****F**** Heatmap showing the expression of Ifng, Isg15, Cxcl9, and Ccl5 in SB1 i.hep. Model in padi4-wt and padi4-ko mice treated with saline or UPARANT by qPCR.

Data are presented as mean ± SD; *p < 0.05, **p < 0.01.

****
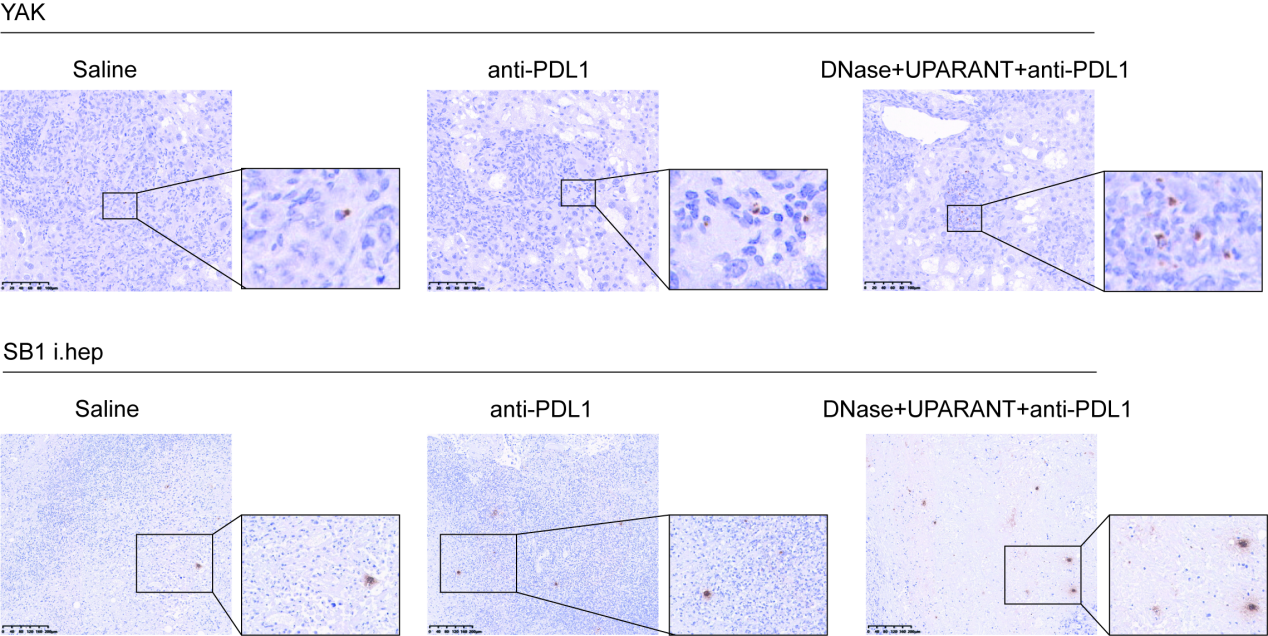
Figure S6 Evaluation of immune activation of combined therapy****

Representative images of GZMB staining in YAK **(A)** and SB1 i.hep **(B)** model with indicated treatment.

| **Supplementary Table 1: qPCR primers used in the study** |
| --- |
| Species Primer Name Direction Sequence(5'-3') |
| Human CCL5 Forward CCTGCTGCTTTGCCTACATTGC |
| Human CCL5 Reverse ACACACTTGGCGGTTCTTTCGG |
| Human mapk13 Forward TGAGCCGACCCTTTCAGTC |
| Human mapk13 Reverse AGCCCAATGACGTTCTCATGC |
| Human DUSP6 Forward GAAATGGCGATCAGCAAGACG |
| Human DUSP6 Reverse CGACGACTCGTATAGCTCCTG |
| Human FOS Forward GGGGCAAGGTGGAACAGTTAT |
| Human FOS Reverse CCGCTTGGAGTGTATCAGTCA |
| Human JUN Forward TCCAAGTGCCGAAAAAGGAAG |
| Human JUN Reverse CGAGTTCTGAGCTTTCAAGGT |
| Human ISG15 Forward CTCTGAGCATCCTGGTGAGGAA |
| Human ISG15 Reverse AAGGTCAGCCAGAACAGGTCGT |
| Human cxcl10 Forward GTGGCATTCAAGGAGTACCTC |
| Human cxcl10 Reverse TGATGGCCTTCGATTCTGGATT |
| Human cxcl9 Forward CTGTTCCTGCATCAGCACCAAC |
| Human cxcl9 Reverse TGAACTCCATTCTTCAGTGTAGCA |
| Human upa Forward GCCATCCCGGACTATACAGA |
| Human upa Reverse AGGCCATTCTCTTCCTTGGT |
| Human upar Forward CTGGAGCTGGTGGAGAAAAG |
| Human upar Reverse TGTTGCAGCATTTCAGGAAG |
| Mouse Ccl5 Forward CTCCAATCTTGCAGTCGTGTTT |
| Mouse Ccl5 Reverse AGAGCAAGCAATGACAGGGAA |
| Mouse ifng Forward ATGAACGCTACACACTGCATC |
| Mouse ifng Reverse CCATCCTTTTGCCAGTTCCTC |
| Mouse ifit1 Forward CTGAGATGTCACTTCACATGGAA |
| Mouse ifit1 Reverse GTGCATCCCCAATGGGTTCT |
| Mouse isg15 Forward GGTGTCCGTGACTAACTCCAT |
| Mouse isg15 Reverse TGGAAAGGGTAAGACCGTCCT |
| Mouse cxcl10 Forward CCAAGTGCTGCCGTCATTTTC |
| Mouse cxcl10 Reverse GGCTCGCAGGGATGATTTCAA |
| Mouse cxcl9 Forward GGAGTTCGAGGAACCCTAGTG |
| Mouse cxcl9 Reverse GGGATTTGTAGTGGATCGTGC |
| Mouse cd274 Forward GCTCCAAAGGACTTGTACGTG |
| Mouse cd274 Reverse TGATCTGAAGGGCAGCATTTC |

****Reference****

[1] Dong L, Lu D, Chen R, et al. Proteogenomic characterization identifies clinically relevant subgroups of intrahepatic cholangiocarcinoma[J]. Cancer cell. 2022, 40(1): 70-87.

[2] Jusakul A, Cutcutache I, Yong C H, et al. Whole-Genome and Epigenomic Landscapes of Etiologically Distinct Subtypes of Cholangiocarcinoma[J]. Cancer discovery. 2017, 7(10): 1116-1135.

[3] Fan Z, Zou X, Wang G, et al. A transcriptome based molecular classification scheme for cholangiocarcinoma and subtype-derived prognostic biomarker[J]. Nature communications. 2024, 15(1): 484.

[4] Sia D, Hoshida Y, Villanueva A, et al. Integrative molecular analysis of intrahepatic cholangiocarcinoma reveals 2 classes that have different outcomes[J]. Gastroenterology. 2013, 144(4): 829-840.

[5] Ni J, Li C, Xu X, et al. Multi-omics analysis uncovers predictive biomarkers for the efficacy and outcomes of chemoimmunotherapy in advanced unresectable biliary tract cancers[J]. BMC medicine. 2025, 23(1): 435.

[6] Wang L, Liu Y, Dai Y, et al. Single-cell RNA-seq analysis reveals BHLHE40-driven pro-tumour neutrophils with hyperactivated glycolysis in pancreatic tumour microenvironment[J]. Gut. 2023, 72(5): 958-971.

[7] Yang L, Luo Q, Lu L, et al. Increased neutrophil extracellular traps promote metastasis potential of hepatocellular carcinoma via provoking tumorous inflammatory response[J]. Journal of hematology & oncology. 2020, 13(1): 3.

[8] Hu Q, Shi H, Zeng T, et al. Increased neutrophil extracellular traps activate NLRP3 and inflammatory macrophages in adult-onset Still's disease[J]. Arthritis research & therapy. 2019, 21(1): 9.

[9] Wang S, Liang X, Li H, et al. The NET-DNA-CCDC25 inhibitor di-Pal-MTO suppresses tumor progression and promotes the innate immune response[J]. Cellular & molecular immunology. 2025, 22(6): 628-644.

[10] Hu X, Zhang R, Yao J, et al. Wild‑type KRAS inhibits the migration and invasion of pancreatic cancer through the Wnt/β‑catenin pathway[J]. Molecular medicine reports. 2023, 27(1): 4.

[11] Jia J, Wang M, Meng J, et al. Ferritin triggers neutrophil extracellular trap-mediated cytokine storm through Msr1 contributing to adult-onset Still's disease pathogenesis[J]. Nature communications. 2022, 13(1): 6804.

[12] Xie S, Yang L, Wei R, et al. Targeting SPP1-orchestrated neutrophil extracellular traps-dominant pre-metastatic niche reduced HCC lung metastasis[J]. Experimental hematology & oncology. 2024, 13(1): 111.

[13] Shen X, Xie S, Xu J, et al. Pan-Cancer Analysis Reveals a Distinct Neutrophil Extracellular Trap-Associated Regulatory Pattern[J]. Frontiers in immunology. 2022, 13: 798022.
